# Supplementary material for: Nickel, copper, and zinc dinuclear helicates: how do bulky groups influence their architecture?
Source: Royal Society of Chemistry journal article supplement (doi:10.1039/d4dt00279b), 2024-01-01
Supplement: d4dt00279b1.pdf [file d4dt00279b1.pdf]

## Supporting Information

### Nickel, copper, and zinc dinuclear helicates. How do bulky groups influence their architecture?

Sandra Fernández-Fariña,<sup>b</sup> Marcelino Maneiro,<sup>b</sup> Guillermo Zaragoza,<sup>c</sup> José M. Seco,<sup>d</sup> Rosa Pedrido,<sup>a,\*</sup> and Ana M. González-Noya<sup>a,\*</sup>

<sup>a</sup> Departamento de Química Inorgánica, Facultade de Química, Campus Vida, Universidade de Santiago de Compostela, Santiago de Compostela, Galicia, E-15782, Spain.

<sup>b</sup> Departamento de Química Inorgánica, Facultade de Ciencias, Campus Terra, Universidade de Santiago de Compostela, E-27002, Lugo, Spain.

<sup>c</sup> Unidade de Difracción de Raios X, Edificio CACTUS, Universidade de Santiago de Compostela, Campus Sur, Santiago de Compostela, Galicia, E-15782, Spain.

<sup>d</sup> Departamento de Química Orgánica Facultade de Química, Campus Vida, Universidade de Santiago de Compostela, Santiago de Compostela, Galicia, E-15782, Spain.

## Table of contents

|                                                                                                                                                               |           |
|---------------------------------------------------------------------------------------------------------------------------------------------------------------|-----------|
| <b>1. Experimental data of Schiff base ligands (3-5) .....</b>                                                                                                | <b>3</b>  |
| Figure S1. NMR spectrum of the ligand H <sub>2</sub> L <sup>3</sup> 3 (400 MHz, acetone-d <sub>6</sub> ).....                                                 | 3         |
| Figure S2. NMR spectrum of the ligand H <sub>2</sub> L <sup>4</sup> 4 (400 MHz, acetone-d <sub>6</sub> ).....                                                 | 3         |
| Figure S3. NMR spectrum of the ligand H <sub>2</sub> L <sup>5</sup> 5 (400 MHz, acetone-d <sub>6</sub> ).....                                                 | 4         |
| <b>2. Crystallographic data of ligands H<sub>2</sub>L<sup>4</sup> 4* and H<sub>2</sub>L<sup>5</sup> 5* .....</b>                                              | <b>4</b>  |
| <b>3. Experimental data of nickel and zinc helicates.....</b>                                                                                                 | <b>6</b>  |
| Figure S4. Mass spectrum of [Ni <sub>2</sub> (L <sup>1</sup> ) <sub>2</sub> ] 6. ....                                                                         | 6         |
| Figure S5. Mass spectrum of [Ni <sub>2</sub> (L <sup>4</sup> ) <sub>2</sub> ] 9. ....                                                                         | 6         |
| Figure S6. Mass spectrum of [Cu <sub>2</sub> (L <sup>3</sup> ) <sub>2</sub> ] 11.....                                                                         | 6         |
| Figure S7. Mass spectrum of [Zn <sub>2</sub> (L <sup>2</sup> ) <sub>2</sub> ] 12.....                                                                         | 7         |
| Figure S8. Mass spectrum of [Zn <sub>2</sub> (L <sup>5</sup> ) <sub>2</sub> ] 15.....                                                                         | 7         |
| Figure S9. π-π interactions and hydrogen bonds in [Zn <sub>2</sub> (L <sup>1</sup> ) <sub>2</sub> ] 2.8CH <sub>3</sub> OH 6*.....                             | 7         |
| Figure S10. Intermolecular CH···π interactions in the crystal lattice of the [Zn <sub>2</sub> (L <sup>1</sup> ) <sub>2</sub> ] 2.8CH <sub>3</sub> OH 6* ..... | 8         |
| Figure S11. Intramolecular hydrogen bonds in [Ni <sub>2</sub> (L <sup>2</sup> ) <sub>2</sub> ]·CH <sub>3</sub> CN 7*.....                                     | 8         |
| Figure S12. Intramolecular hydrogen bonds in [Ni <sub>2</sub> (L <sup>3</sup> ) <sub>2</sub> ]·2CH <sub>2</sub> Cl 8*.....                                    | 9         |
| Figure S14. Intramolecular hydrogen bonds in [Zn <sub>2</sub> (L <sup>5</sup> ) <sub>2</sub> ]·2CH <sub>3</sub> CN 18*.....                                   | 10        |
| <b>Crystallographic data of helicates.....</b>                                                                                                                | <b>10</b> |

## 1. Experimental data of Schiff base ligands (3-5)

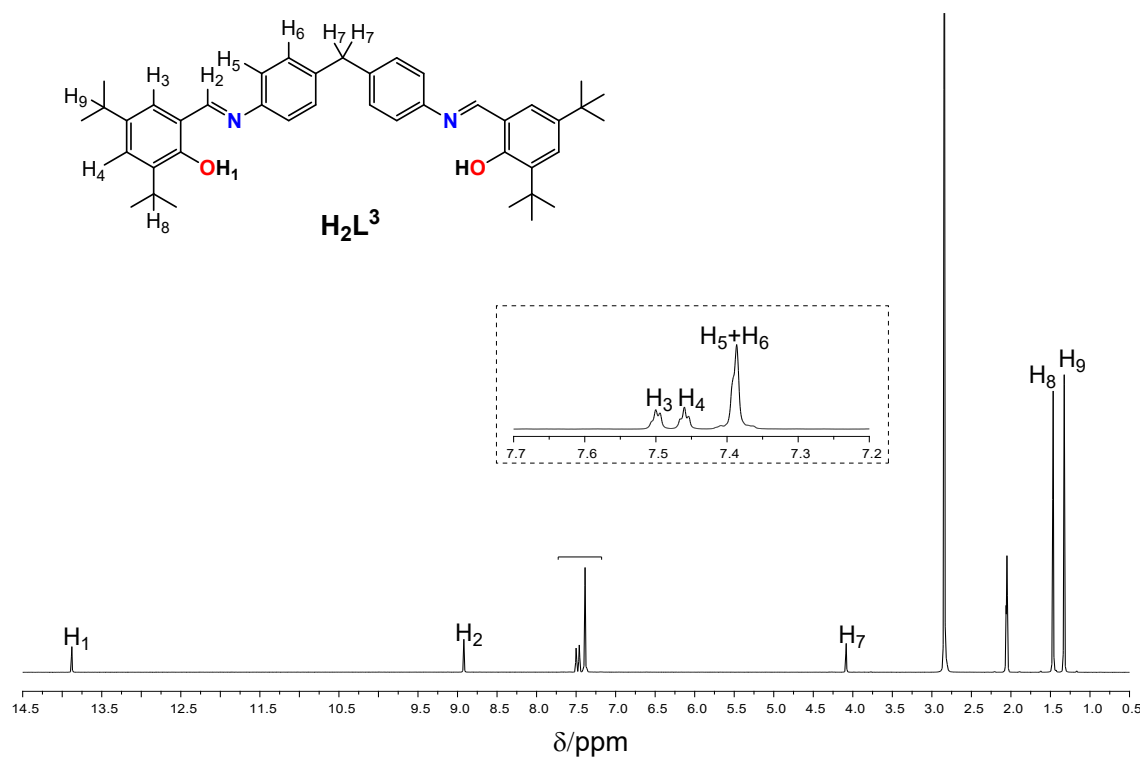

Figure S1. NMR spectrum of the ligand  $H_2L^3$  3 (400 MHz, acetone- $d_6$ ).

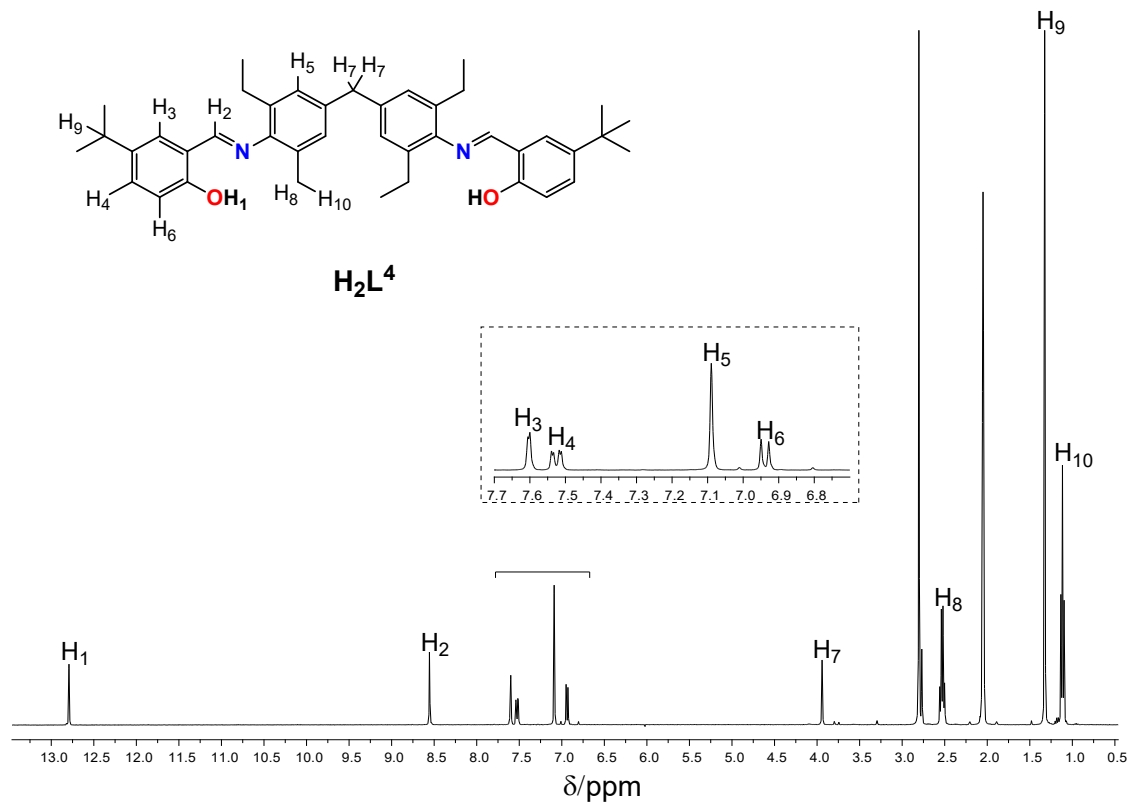

Figure S2. NMR spectrum of the ligand  $H_2L^4$  4 (400 MHz, acetone- $d_6$ ).

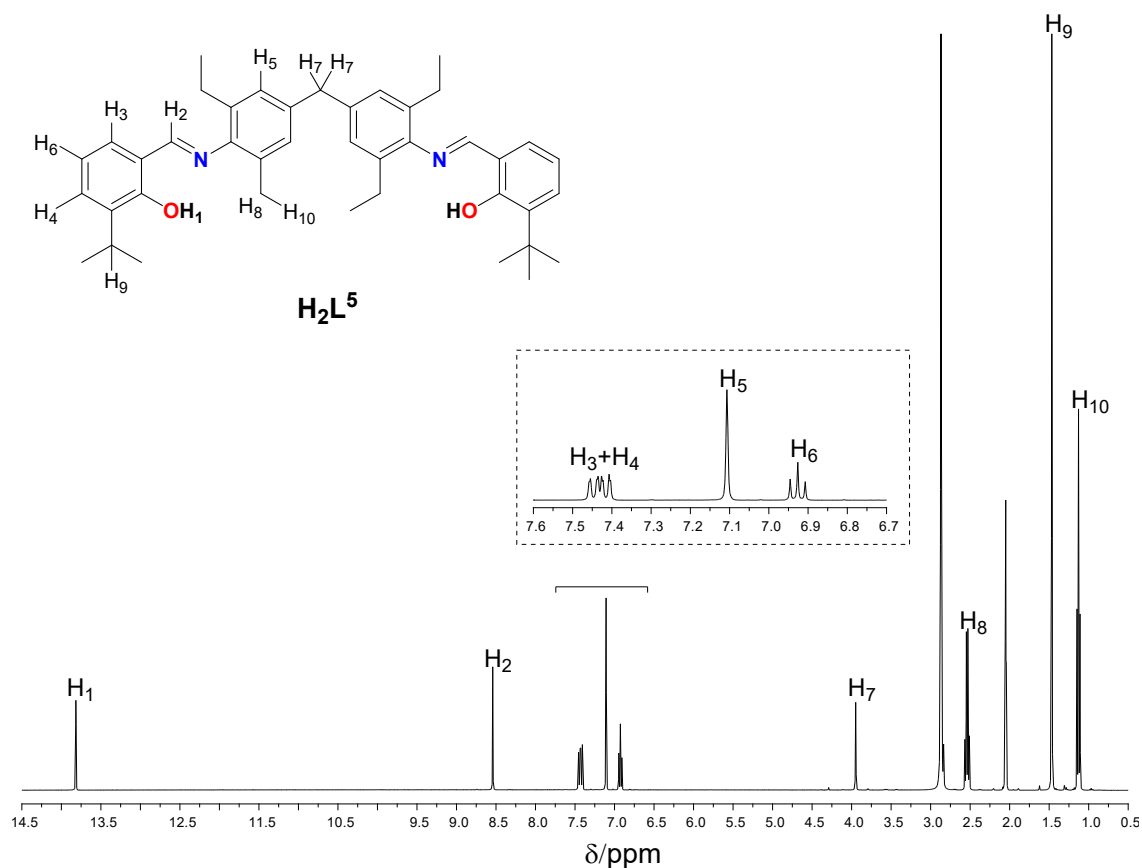

**Figure S3.** NMR spectrum of the ligand  $H_2L^5$  **5** (400 MHz, acetone- $d_6$ ).

## 2. Crystallographic data of ligands $H_2L^4$ **4\*** and $H_2L^5$ **5\***

**$H_2L^4$  **4\***:**  $C_{43}H_{54}N_2O_2$ ,  $M_w = 630.88$  g/mol, crystal dimensions:  $0.34 \times 0.22 \times 0.05$  mm<sup>3</sup>, triclinic,  $P\bar{1}$ ,  $a = 9.0717(8)$ ,  $b = 9.9041(7)$ ,  $c = 22.0498(19)$  Å,  $\alpha = 77.049(3)$ ,  $\beta = 78.483(4)$ ,  $\gamma = 79.415(4)$  °,  $V = 1871.7(3)$  Å<sup>3</sup>,  $Z = 2$ ,  $\mu = 0.07$  mm<sup>-1</sup>, radiation  $\lambda(\text{Mo-K}\alpha) = 0.7107$  Å,  $T = 100$  K, measured/unique reflexions 139133/13629 ( $R_{int} = 0.068$ ),  $R = 0.049$ ,  $wR = 0.146$ ,  $GOF = 1.032$ , max/min residual density 0.37/ -0.27 e.Å<sup>-3</sup>.

**$H_2L^5$  **5\***:**  $C_{43}H_{54}N_2O_2$ ,  $M_w = 630.88$  g/mol, crystal dimensions:  $0.18 \times 0.11 \times 0.09$  mm<sup>3</sup>, triclinic,  $P\bar{1}$ ,  $a = 9.9049(12)$ ,  $b = 13.1890(19)$ ,  $c = 15.798(2)$  Å,  $\alpha = 67.796(5)$ ,  $\beta = 82.499(5)$ ,  $\gamma = 76.969(5)$  °,  $V = 1859.2(4)$  Å<sup>3</sup>,  $Z = 2$ ,  $\mu = 0.07$  mm<sup>-1</sup>, radiation  $\lambda(\text{Mo-K}\alpha) = 0.7107$  Å,  $T = 100$  K, measured/unique reflexions 78814/9228 ( $R_{int} = 0.111$ ),  $R = 0.065$ ,  $wR = 0.135$ ,  $GOF = 1.073$ , max/min residual density 0.27/ -0.28 e.Å<sup>-3</sup>.

**Table S1.** Main bond distances and angles in H<sub>2</sub>L<sup>4</sup> 4\*.

| <b>Bond distances (Å)</b> |             |                   |             |
|---------------------------|-------------|-------------------|-------------|
| <b>C4—O1</b>              | 1.3547 (13) | <b>C23—O2</b>     | 1.3509 (12) |
| <b>C8—N1</b>              | 1.4339 (13) | <b>C21—N2</b>     | 1.2837 (13) |
| <b>O1—H1…N1</b>           | 0.94 (2)    | <b>O2—H2…N2</b>   | 0.923 (19)  |
| <b>Bond angles (°)</b>    |             |                   |             |
| <b>O1—C4—C3</b>           | 119.18 (9)  | <b>O2—C23—C22</b> | 122.02 (9)  |
| <b>O1—C4—C5</b>           | 121.98 (9)  | <b>O2—C23—C24</b> | 118.89 (9)  |
| <b>C13—C8—N1</b>          | 119.92 (9)  | <b>C17—C18—N2</b> | 118.62 (9)  |
| <b>C9—C8—N1</b>           | 118.39 (9)  | <b>C19—C18—N2</b> | 119.65 (9)  |
| <b>N1—C7—C5</b>           | 121.60 (9)  | <b>N2—C21—C22</b> | 120.80 (9)  |
| <b>C13—C8—N1</b>          | 119.92 (9)  | <b>C17—C18—N2</b> | 118.62 (9)  |
| <b>C7—N1—C8</b>           | 119.04 (9)  | <b>C21—N2—C18</b> | 122.22 (9)  |

**Table S2.** Main bond distances and angles in H<sub>2</sub>L<sup>5</sup> 5\*.

| <b>Bond distances (Å)</b> |             |                   |             |
|---------------------------|-------------|-------------------|-------------|
| <b>C18—O1</b>             | 1.348 (2)   | <b>C4—O2</b>      | 1.351 (2)   |
| <b>C6—N1</b>              | 1.277 (2)   | <b>C16—N2</b>     | 1.281 (2)   |
| <b>C7—N1</b>              | 1.435 (2)   | <b>C15—N2</b>     | 1.420 (2)   |
| <b>O1—H1…N2</b>           | 0.92 (2)    | <b>O2—H2…N1</b>   | 0.95 (2)    |
| <b>Bond angles (°)</b>    |             |                   |             |
| <b>O1—C18—C19</b>         | 119.39 (16) | <b>O2—C4—C5</b>   | 119.49 (17) |
| <b>O1—C18—C17</b>         | 119.63 (17) | <b>O2—C4—C3</b>   | 119.32 (17) |
| <b>N1—C6—C5</b>           | 122.89 (18) | <b>C14—C15—N2</b> | 116.82 (16) |
| <b>C8—C7—N1</b>           | 120.33 (16) | <b>C32—C15—N2</b> | 122.59 (16) |
| <b>C28—C7—N1</b>          | 118.24 (16) | <b>N2—C16—C17</b> | 121.88 (17) |
| <b>C6—N1—C7</b>           | 120.01 (16) | <b>C16—N2—C15</b> | 123.51 (16) |
| <b>O1—C18—C19</b>         | 119.39 (16) | <b>O2—C4—C5</b>   | 119.49 (17) |

### 3. Experimental data of nickel and zinc helicates

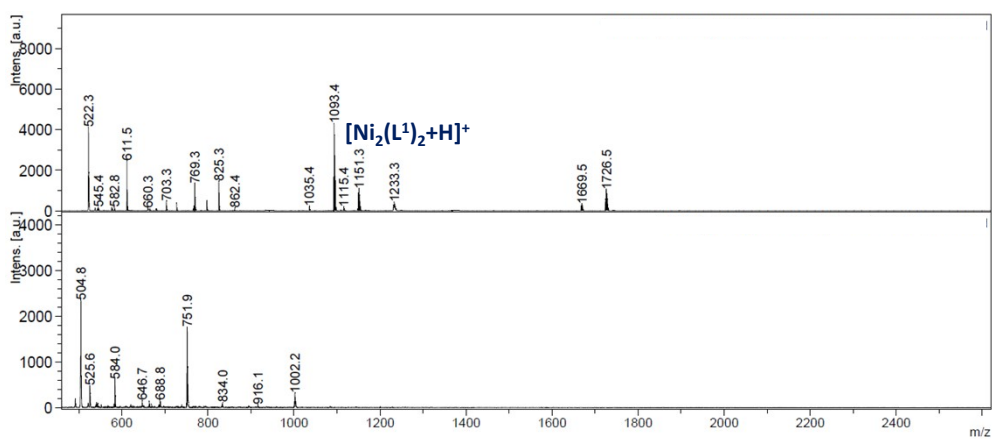

Figure S4. Mass spectrum of  $[\text{Ni}_2(\text{L}^1)_2]$  **6**.

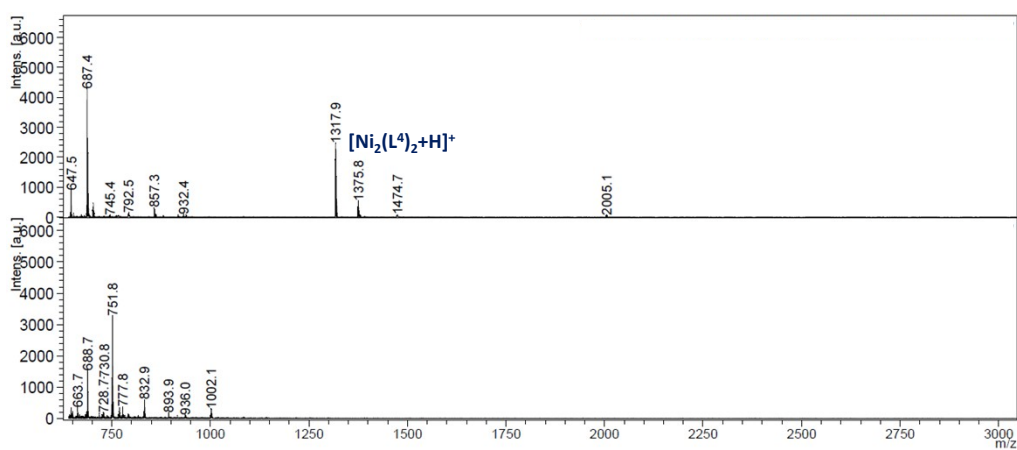

Figure S5. Mass spectrum of  $[\text{Ni}_2(\text{L}^4)_2]$  **9**.

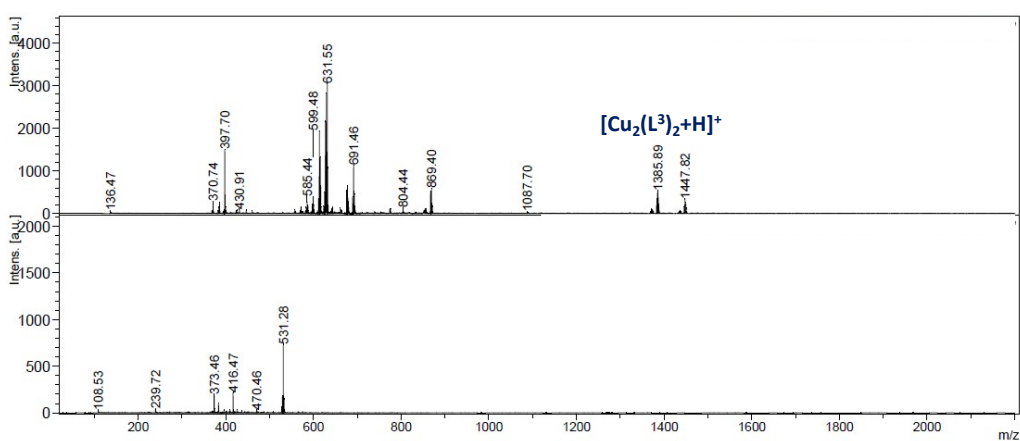

Figure S6. Mass spectrum of  $[\text{Cu}_2(\text{L}^3)_2]$  **11**.

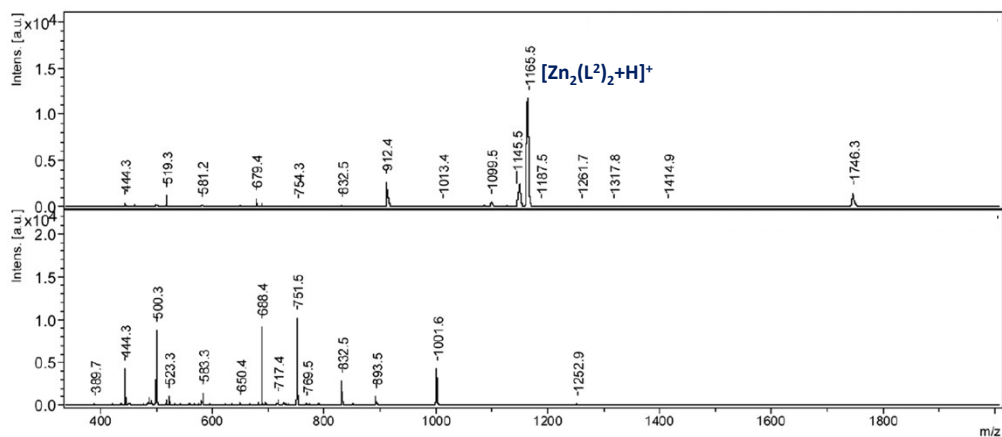

Figure S7. Mass spectrum of  $[\text{Zn}_2(\text{L}^2)_2+\text{H}]^+$ .

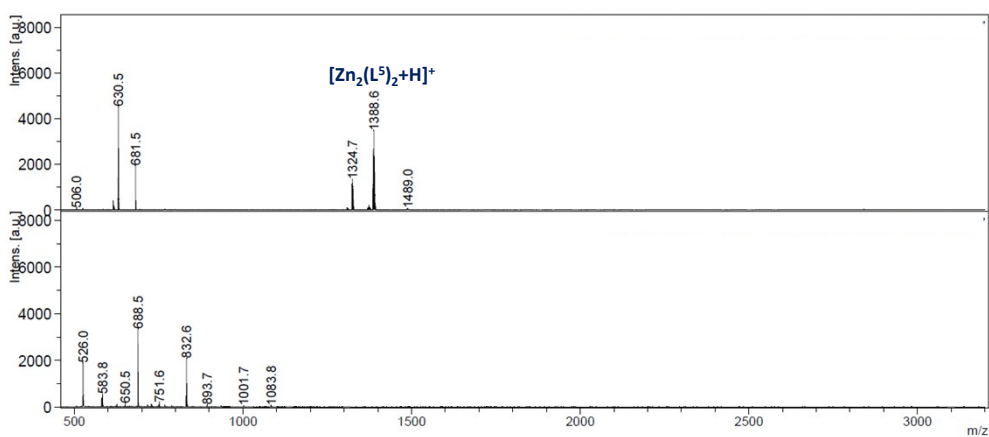

Figure S8. Mass spectrum of  $[\text{Zn}_2(\text{L}^5)_2+\text{H}]^+$ .

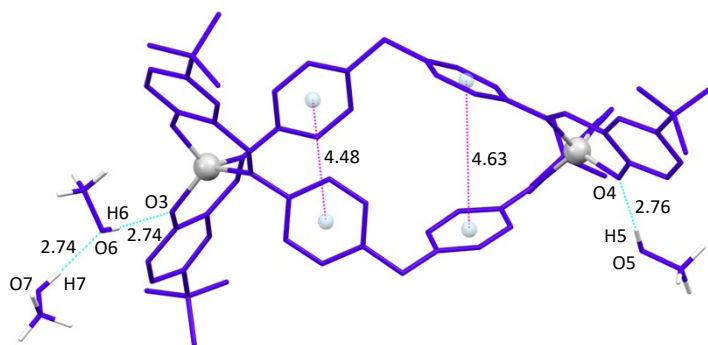

Figure S9.  $\pi$ - $\pi$  interactions and hydrogen bonds in  $[\text{Zn}_2(\text{L}^1)_2] \cdot 2.8\text{CH}_3\text{OH}$  **6\***.

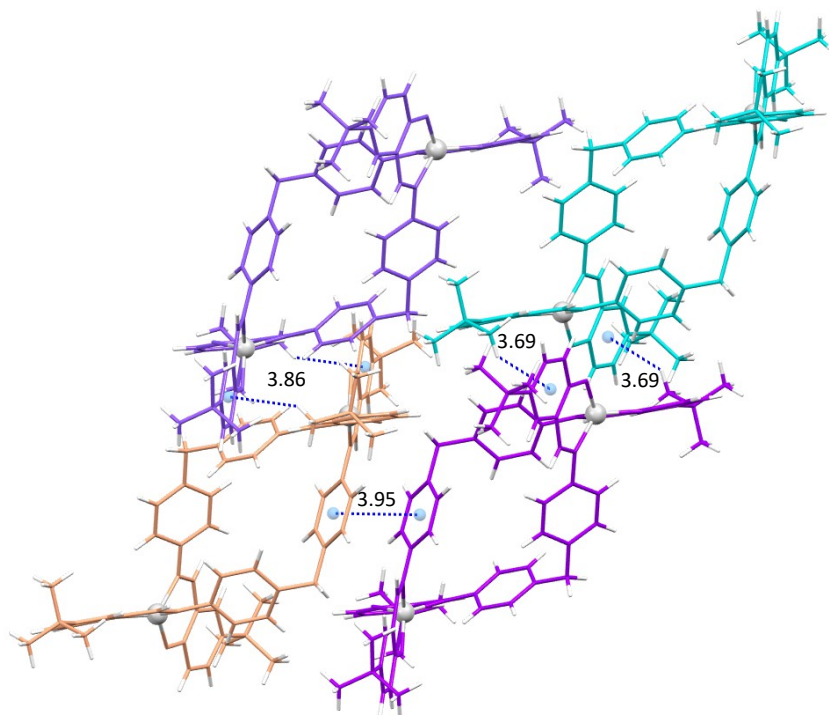

**Figure S10.** Intermolecular CH $\cdots\pi$  interactions in the crystal lattice of the  $[\text{Zn}_2(\text{L}^1)_2] \cdot 2.8\text{CH}_3\text{OH}$  **6\***: C66—H66c $\cdots$ centroid 3.86 Å, C33—H33c $\cdots$ centroid 3.69 Å.

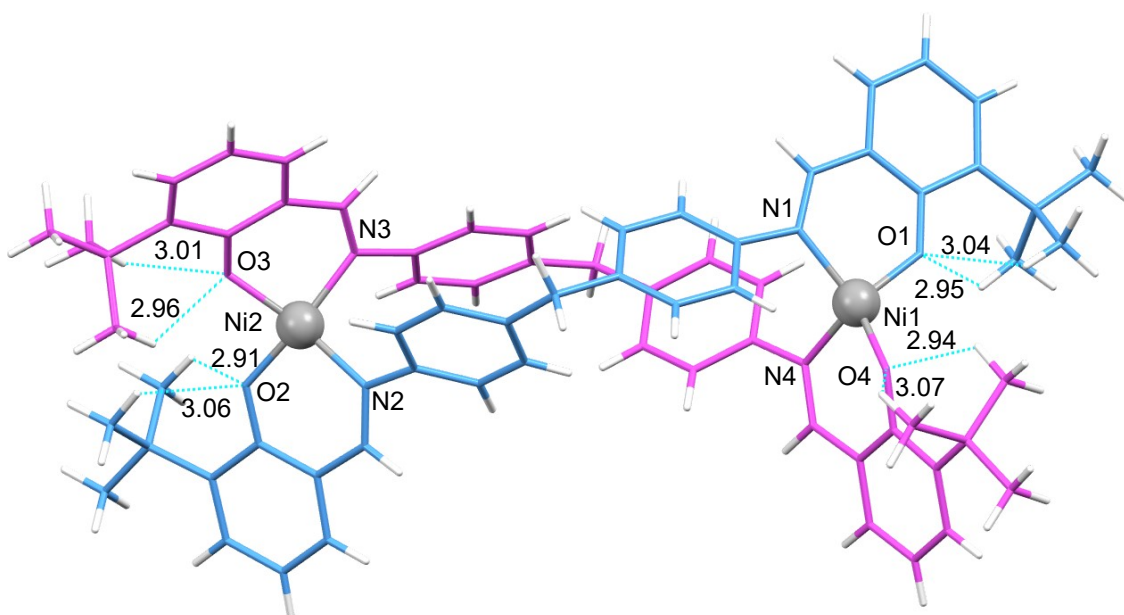

**Figure S11.** Intramolecular hydrogen bonds in  $[\text{Ni}_2(\text{L}^2)_2] \cdot \text{CH}_3\text{CN}$  **7\***: C33—H33B $\cdots$ O2 3.05 Å, C34—H34C $\cdots$ O2 2.94 Å, C64—H64B $\cdots$ O3 2.91 Å, C65—H65C $\cdots$ O3 2.99 Å, C69—H69B $\cdots$ O4 2.97 Å, C70—H70C $\cdots$ O4 2.99 Å, C29—H29B $\cdots$ O1 2.92 Å, C30—H30B $\cdots$ O1 3.03 Å.



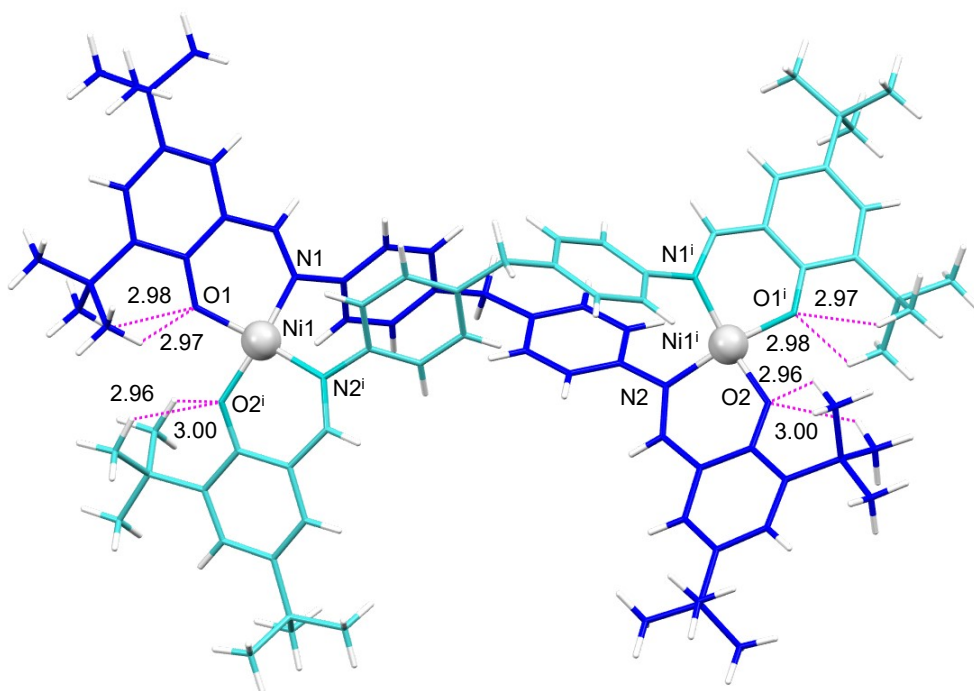

**Figure S12.** Intramolecular hydrogen bonds in  $[\text{Ni}_2(\text{L}^3)]_2 \cdot 2\text{CH}_2\text{Cl}$  **8\***: C29–H29B...O2 2.97 Å, C30–H30B...O1 2.98 Å, C37–H37A...O2 2.96 Å, C38–H38C...O2 3.00 Å.

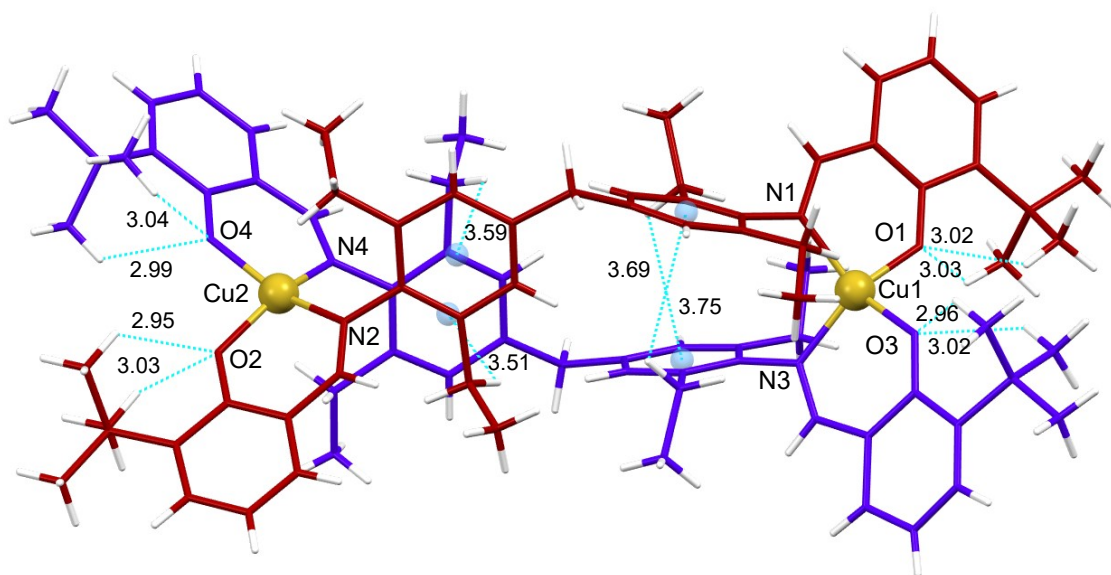

**Figure S13.** Intramolecular hydrogen bonds in  $[\text{Cu}_2(\text{L}^5)]_2 \cdot 3\text{CH}_3\text{CN}$  **13\***: C84–H84C...O4 3.04 Å, C86–H86B...O4 2.99 Å, C41–H41C...O2 3.03 Å, C42–H42B...O2 2.95 Å, C29–H29E...O1 3.02 Å, C30–H30F...O1 3.03 Å, C73–H73B...O3 2.96 Å, C74–H74C...O3 3.02 Å.

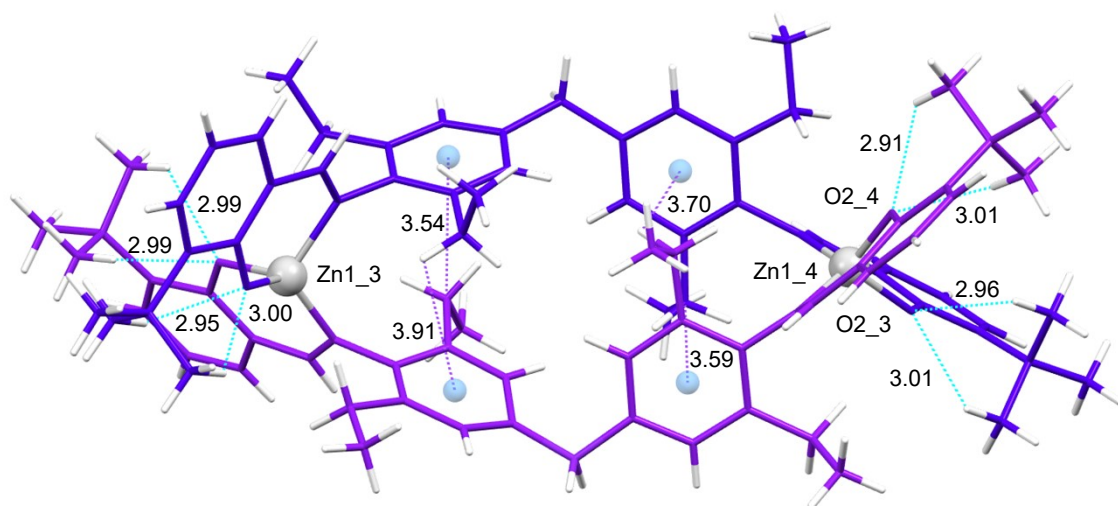

**Figure S14.** Intramolecular hydrogen bonds in  $[Zn_2(L^5)_2] \cdot 2CH_3CN$  **18\***: C41–H41C<sub>4</sub>···O2<sub>4</sub> 2.91 Å, C42–H42B<sub>4</sub>···O2<sub>4</sub> 3.01 Å, C42–H42C···O2<sub>3</sub> 3.01 Å, C43–H43B···O2<sub>3</sub> 2.96 Å, C30–H30B···O1<sub>4</sub> 2.99 Å, C31–H31C···O1<sub>4</sub> 2.99 Å, C29–H29C···O1<sub>3</sub> 2.95 Å, C30–H30B···O1<sub>3</sub> 3.00 Å.

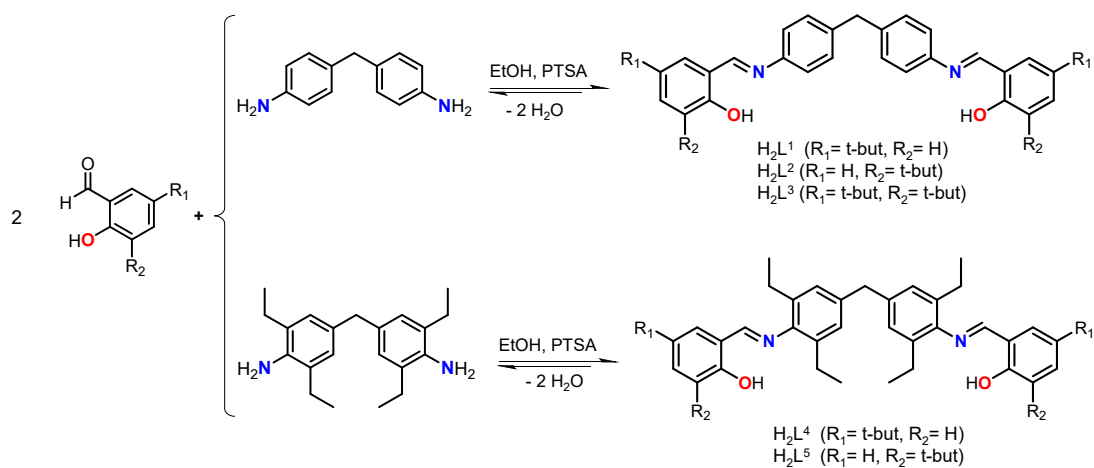

**Figure S15.** Synthesis of the Schiff base ligands  $H_2L^n$  ( $n = 1-5$ ).

## Crystallographic data of helicates

**[Ni<sub>2</sub>(L<sup>2</sup>)<sub>2</sub>·CH<sub>3</sub>CN 7\*]:** C<sub>72</sub>H<sub>75</sub>N<sub>5</sub>O<sub>4</sub>Ni<sub>2</sub>, *Mw* = 1191.79 g/mol, crystal dimensions: 0.18 × 0.16 × 0.04 mm<sup>3</sup>, triclinic,  $P\bar{1}$ ,  $a = 11.7230(6)$ ,  $b = 13.6632(7)$ ,  $c = 19.6313(7)$  Å,  $\alpha = 97.023(2)$ ,  $\beta = 100.791(2)$ ,  $\gamma = 101.103(2)$  °,  $V = 2989.8(2)$  Å<sup>3</sup>,  $Z = 2$ ,  $\mu = 0.69$  mm<sup>-1</sup>, Radiation  $\lambda(\text{Mo-K}\alpha) = 0.7107$  Å,  $T = 100$  K, measured/unique reflexions 96565/14845 ( $R_{int} = 0.061$ ),  $R = 0.047$ ,  $wR = 0.123$ ,  $GOF = 1.042$ , max/min residual density 0.57/ -1.11 e.Å<sup>-3</sup>.

**[Ni<sub>2</sub>(L<sup>3</sup>)<sub>2</sub>·2CH<sub>2</sub>Cl<sub>2</sub> 8\*]:** C<sub>90</sub>H<sub>108</sub>N<sub>4</sub>Ni<sub>2</sub>O<sub>4</sub>Cl<sub>4</sub>, *Mw* = 1375.18 g/mol, crystal dimensions: 0.13 × 0.04 × 0.03 mm<sup>3</sup>, monoclinic,  $I2/a$ ,  $a = 19.7738(18)$ ,  $b = 17.4199(10)$ ,  $c = 23.6472(11)$  Å,  $\alpha = 90$ ,  $\beta = 100.801(1)$ ,  $\gamma = 90$  °,  $V = 8001.2(9)$  Å<sup>3</sup>,  $Z = 4$ ,  $\mu = 0.59$  mm<sup>-1</sup>, Radiation  $\lambda(\text{Mo-K}\alpha) = 0.7107$  Å,  $T = 100$  K, measured/unique reflexions 160186/9930 ( $R_{int} = 0.065$ ),  $R = 0.093$ ,  $wR = 0.099$ ,  $GOF = 1.02$ , max/min residual density 0.38/ -0.55 e.Å<sup>-3</sup>.

**[Cu<sub>2</sub>(L<sup>3</sup>)<sub>2</sub>·2CH<sub>3</sub>CN 11\*]:** C<sub>90</sub>H<sub>110</sub>N<sub>6</sub>Cu<sub>2</sub>O<sub>4</sub>, *Mw* = 1466.91 g/mol, crystal dimensions: 0.24 × 0.12 × 0.11 mm<sup>3</sup>, monoclinic,  $I2/a$ ,  $a = 19.6676(9)$ ,  $b = 17.5879(8)$ ,  $c = 23.6719(17)$  Å,  $\alpha = 90$ ,  $\beta = 101.008(2)$ ,  $\gamma = 90$  °,  $V = 8038.7(8)$  Å<sup>3</sup>,  $Z = 4$ ,  $\mu = 0.65$  mm<sup>-1</sup>, Radiation  $\lambda(\text{Mo-K}\alpha) = 0.7107$  Å,  $T = 100$  K, measured/unique reflexions 46963/7369 ( $R_{int} = 0.065$ ),  $R = 0.046$ ,  $wR = 0.123$ ,  $GOF = 1.02$ , max/min residual density 0.39/ -0.47 e.Å<sup>-3</sup>.

**[Cu<sub>2</sub>(L<sup>5</sup>)<sub>2</sub>·3CH<sub>3</sub>CN 13\*]:** 2(C<sub>90</sub>H<sub>110</sub>N<sub>6</sub>Cu<sub>2</sub>O<sub>4</sub>)3(C<sub>2</sub>H<sub>3</sub>N), *Mw* = 2892.84 g/mol, crystal dimensions: 0.17 × 0.15 × 0.05 mm<sup>3</sup>, triclinic,  $P\bar{1}$ ,  $a = 13.6211(3)$ ,  $b = 16.0269(4)$ ,  $c = 18.3522(5)$  Å,  $\alpha = 92.519(1)$ ,  $\beta = 97.528(1)$ ,  $\gamma = 95.604(1)$  °,  $V = 3946.30(17)$  Å<sup>3</sup>,  $Z = 1$ ,  $\mu = 0.59$  mm<sup>-1</sup>, Radiation  $\lambda(\text{Mo-K}\alpha) = 0.7107$  Å,  $T = 100$  K, measured/unique reflexions 116110/22115 ( $R_{int} = 0.045$ ),  $R = 0.045$ ,  $wR = 0.121$ ,  $GOF = 1.022$ , max/min residual density 0.56/ -0.57 e.Å<sup>-3</sup>.

**[Zn<sub>2</sub>(L<sup>1</sup>)<sub>2</sub>·2.8CH<sub>3</sub>OH 14\*]:** C<sub>73</sub>H<sub>84</sub>N<sub>4</sub>O<sub>7</sub>Zn<sub>2</sub>, *Mw* = 1260.23 g/mol, crystal dimensions: 0.22 × 0.18 × 0.13 mm<sup>3</sup>, triclinic,  $P\bar{1}$ ,  $a = 11.9567(6)$ ,  $b = 14.1684(5)$ ,  $c = 20.5193(10)$  Å,  $\alpha = 88.561(2)$ ,  $\beta = 74.498(2)$ ,  $\gamma = 79.166(2)$  °,  $V = 3288.3(3)$  Å<sup>3</sup>,  $Z = 2$ ,  $\mu = 0.790$  mm<sup>-1</sup>, radiation  $\lambda(\text{Mo-K}\alpha) = 0.7107$  Å,  $T = 100$  K, measured/unique reflexions 80891/15651 ( $R_{int} = 0.046$ ),  $R = 0.045$ ,  $wR = 0.120$ ,  $GOF = 1.055$ , max/min residual density 1.06/ -0.55 e.Å<sup>-3</sup>.

**[Zn<sub>2</sub>(L<sup>5</sup>)<sub>2</sub>·2CH<sub>3</sub>CN 18\*]:** C<sub>90</sub>H<sub>110</sub>Zn<sub>2</sub>N<sub>6</sub>O<sub>4</sub>, *Mw* = 1470.63 g/mol, crystal dimensions: 0.08 × 0.06 × 0.03 mm<sup>3</sup>, triclinic,  $P\bar{1}$ ,  $a = 16.3465(6)$ ,  $b = 19.9440(7)$ ,  $c = 25.4842(10)$  Å,  $\alpha = 98.5050(10)$ ,  $\beta = 93.3200(10)$ ,  $\gamma = 97.5040(10)$  °,  $V = 8121.2(5)$  Å<sup>3</sup>,  $Z = 4$ ,  $\mu = 0.64$  mm<sup>-1</sup>, Radiation  $\lambda(\text{Mo-K}\alpha) = 0.7107$  Å,  $T = 100$  K, measured/unique reflexions 342113/9707 ( $R_{int} = 0.053$ ),  $R = 0.079$ ,  $wR = 0.121$ ,  $GOF = 1.076$ , max/min residual density 0.64/ -0.61 e.Å<sup>-3</sup>.

**Table S3.** Main bond distances and angles in  $[\text{Ni}_2(\text{L}^2)_2]\cdot\text{CH}_3\text{CN}$  **7\***.

| Bond distances (Å) |             |           |             |
|--------------------|-------------|-----------|-------------|
| N1—Ni1             | 1.9586 (19) | O1—Ni1    | 1.8878 (16) |
| N2—Ni2             | 1.906 (2)   | O2—Ni2    | 1.8464 (18) |
| N3—Ni2             | 1.905 (2)   | O3—Ni2    | 1.8796 (17) |
| N4—Ni1             | 1.974 (2)   | O4—Ni1    | 1.8873 (16) |
| Bond angles (°)    |             |           |             |
| O4—Ni1—O1          | 116.41 (7)  | O2—Ni2—O3 | 87.96 (8)   |
| O4—Ni1—N1          | 134.68 (8)  | O2—Ni2—N3 | 161.01 (9)  |
| O1—Ni1—N1          | 93.46 (8)   | O3—Ni2—N3 | 90.84 (8)   |
| O4—Ni1—N4          | 92.30 (8)   | O2—Ni2—N2 | 93.93 (8)   |
| O1—Ni1—N4          | 118.27 (8)  | O3—Ni2—N2 | 156.50 (8)  |
| N1—Ni1—N4          | 102.96 (8)  | N3—Ni2—N2 | 94.68 (9)   |
| O4—Ni1—O1          | 116.41 (7)  | O2—Ni2—O3 | 87.96 (8)   |

**Table S4.** Main bond distances and angles in  $[\text{Ni}_2(\text{L}^3)_2]\cdot 2\text{CH}_2\text{Cl}_2$  **8\***.

| Bond distances (Å)      |             |                                      |             |
|-------------------------|-------------|--------------------------------------|-------------|
| N1—Ni1                  | 1.905 (2)   | O1—Ni1                               | 1.8421 (19) |
| N2—Ni1 <sup>i</sup>     | 1.903 (2)   | O2—Ni1 <sup>i</sup>                  | 1.8516 (19) |
| Bond angles (°)         |             |                                      |             |
| O1—Ni1—O2 <sup>i</sup>  | 84.16 (9)   | O1—Ni1—N1                            | 93.18 (9)   |
| N2 <sup>i</sup> —Ni1—N1 | 97.16 (10)  | O2 <sup>i</sup> —Ni1—N1              | 160.70 (10) |
| O1—Ni1—N2 <sup>i</sup>  | 159.14 (10) | O2 <sup>i</sup> —Ni1—N2 <sup>i</sup> | 91.73 (9)   |

**Table S5.** Main bond distances and angles in  $[\text{Cu}_2(\text{L}^3)_2]\cdot 2\text{CH}_3\text{CN}$  **11\***.

| Bond distances (Å)      |             |                                      |             |
|-------------------------|-------------|--------------------------------------|-------------|
| N1—Cu1                  | 1.9661 (17) | O1—Cu1                               | 1.8952 (15) |
| N2 <sup>i</sup> —Cu1    | 1.9640 (17) | O2—Cu1 <sup>i</sup>                  | 1.8829 (15) |
| Bond angles (°)         |             |                                      |             |
| O1—Cu1—O2 <sup>i</sup>  | 89.15 (7)   | O1—Cu1—N1                            | 91.96 (7)   |
| N2 <sup>i</sup> —Cu1—N1 | 100.40 (7)  | O2 <sup>i</sup> —Cu1—N1              | 147.51 (8)  |
| O1—Cu1—N2 <sup>i</sup>  | 151.84 (7)  | O2 <sup>i</sup> —Cu1—N2 <sup>i</sup> | 93.56 (7)   |

**Table S6.** Main bond distances and angles in  $[\text{Cu}_2(\text{L}^5)_2]\cdot 3\text{CH}_3\text{CN}$  **13\***.

| Bond distances (Å) |             |           |             |
|--------------------|-------------|-----------|-------------|
| N1—Cu1             | 1.9552 (16) | O1—Cu1    | 1.8919 (14) |
| N2—Cu2             | 1.9798 (15) | O2—Cu2    | 1.8969 (14) |
| N3—Cu1             | 1.9613 (15) | O3—Cu1    | 1.9012 (13) |
| N4—Cu2             | 1.9558 (16) | O4—Cu2    | 1.9204 (13) |
| Bond angles (°)    |             |           |             |
| O1—Cu1—O3          | 92.11 (6)   | O2—Cu2—O4 | 88.25 (6)   |
| O1—Cu1—N1          | 94.40 (7)   | O2—Cu2—N4 | 150.24 (7)  |
| O3—Cu1—N1          | 141.15 (6)  | O4—Cu2—N4 | 92.59 (6)   |
| O1—Cu1—N3          | 137.23 (7)  | O2—Cu2—N2 | 93.59 (6)   |
| O3—Cu1—N3          | 93.98 (6)   | O4—Cu2—N2 | 150.94 (6)  |
| N1—Cu1—N3          | 106.50 (6)  | N4—Cu2—N2 | 99.76 (6)   |
| O1—Cu1—O3          | 92.11 (6)   | O2—Cu2—O4 | 88.25 (6)   |

**Table S7.** Main bond distances and angles in  $[\text{Zn}_2(\text{L}^1)_2]\cdot 2.8\text{CH}_3\text{OH}$  **14\***.

| Bond distances (Å) |             |           |             |
|--------------------|-------------|-----------|-------------|
| N1—Zn1             | 2.0038 (18) | O1—Zn1    | 1.9186 (16) |
| N2—Zn2             | 2.003 (2)   | O2—Zn2    | 1.9005 (17) |
| N3—Zn2             | 2.003 (2)   | O3—Zn2    | 1.9164 (16) |
| N4—Zn1             | 2.0027 (19) | O4—Zn1    | 1.9185 (17) |
| Bond angles (°)    |             |           |             |
| O4—Zn1—O1          | 116.81 (7)  | O2—Zn2—O3 | 110.01 (7)  |
| O4—Zn1—N1          | 120.48 (7)  | O2—Zn2—N3 | 126.14 (8)  |
| O1—Zn1—N1          | 96.61 (7)   | O3—Zn2—N3 | 96.41 (7)   |
| O4—Zn1—N4          | 96.04 (7)   | O2—Zn2—N2 | 96.87 (8)   |
| O1—Zn1—N4          | 120.26 (7)  | O3—Zn2—N2 | 126.54 (8)  |
| N1—Zn1—N4          | 108.02 (8)  | N3—Zn2—N2 | 103.74 (8)  |
| O4—Zn1—O1          | 116.81 (7)  | O2—Zn2—O3 | 110.01 (7)  |

**Table S8.** Main bond distances and angles in  $[\text{Zn}_2(\text{L}^5)_2]\cdot 2\text{CH}_3\text{CN}$  **18\***.

| Bond distances (Å)      |             |                                      |             |
|-------------------------|-------------|--------------------------------------|-------------|
| N1—Zn1                  | 1.998 (2)   | N1 <sup>i</sup> —Zn1 <sup>i</sup>    | 2.012 (2)   |
| O1—Zn1                  | 1.924 (2)   | O1 <sup>i</sup> —Zn1                 | 1.920 (2)   |
| Bond angles (°)         |             |                                      |             |
| O1 <sup>i</sup> —Zn1—O1 | 105.84 (9)  | O1 <sup>i</sup> —Zn1—N1 <sup>i</sup> | 94.25 (9)   |
| O1 <sup>i</sup> —Zn1—N1 | 124.79 (10) | O1—Zn1—N1 <sup>i</sup>               | 118.01 (10) |
| O1—Zn1—N1               | 95.57 (9)   | N1—Zn1—N1 <sup>i</sup>               | 119.40 (10) |
